# Supplementary material for: GroEL Chaperonin-Based Assay for Early Diagnosis of Scrub Typhus
Source: MDPI journal article supplement (doi:10.3390/diagnostics12010136), 2022-01-06
Supplement: s1 [file s1]

*Supplementary data*

# GroEL Chaperonin-Based Assay for Early Diagnosis of Scrub Typhus

Nitaya Indrawattana <sup>1</sup>, Pisinee Aiumurai <sup>2</sup>, Nawannaporn Sae-lim <sup>2</sup>, Watee Seesuay <sup>2</sup>, Onrapak Reamtong <sup>3</sup>, Manas Chongsa-nguan <sup>1,4</sup>, Wanpen Chaicumpa <sup>2</sup> and Nitat Sookrung <sup>2,5,\*</sup>

<sup>1</sup> Department of Microbiology and Immunology, Faculty of Tropical Medicine, Mahidol University,  
Bangkok 10400, Thailand; nitaya.ind@mahidol.ac.th (N.I.)

<sup>2</sup> Center of Research Excellence on Therapeutic Proteins and Antibody Engineering, Department of Parasitology, Faculty of Medicine Siriraj Hospital, Mahidol University, Bangkok 10700, Thailand; pisinee.aiu@mahidol.ac.th (P.A.-u);  
nawannaporn.sae@mahidol.edu (N.S.); watee.see@gmail.com (W.S.);  
wanpen.cha@mahidol.ac.th (W.C.)

<sup>3</sup> Department of Molecular Tropical Medicine and Genetics, Faculty of Tropical Medicine, Mahidol University, Bangkok 10400, Thailand; onrapak.rea@mahidol.ac.th

<sup>4</sup> Faculty of Public Health and Environment, Pathumthani University, Pathum Thani 12000; Thailand, mchongsanguan@yahoo.com (M.C.-n)

<sup>5</sup> Biomedical Research Incubator Unit, Department of Research, Faculty of Medicine Siriraj Hospital, Mahidol University, Bangkok 10700, Thailand

\* Correspondence: nitat.soo@mahidol.ac.th; Tel.: +66-2-4196491

|            |                                                              |
|------------|--------------------------------------------------------------|
| AY191588.1 | -----                                                        |
| AY191589.1 | -----                                                        |
| EF551310.1 | -----                                                        |
| EF551303.1 | -----                                                        |
| AY191586.1 | -----                                                        |
| CAM79983.1 | MSKQIVHSDQCRKKIIEGINVVANAVGITLGPKGRCVAIEQSYGPPKITKDGVSVAKAI  |
| BAG39717.1 | MSKQIVHGDQCRKKIIEGINVVANAVGITLGPKGRCVAIEQSYGPPKITKDGVSVAKAIQ |
| M31887.1   | MSKQIVHGDQCRKKIIEGINVVANAVGITLGPKGRCVAIEQSYGPPKITKDGVSVAKAIQ |
| EF551292.1 | -----                                                        |
| EF551295.1 | -----                                                        |
| EF551296.1 | -----                                                        |
| EF551297.1 | -----                                                        |
| EF551298.1 | -----                                                        |
| EF551299.1 | -----                                                        |
| EF551301.1 | -----                                                        |
| EF551302.1 | -----                                                        |
| EF551304.1 | -----                                                        |
| EF551306.1 | -----                                                        |
| EF551307.1 | -----                                                        |
| EF551309.1 | -----                                                        |
| EF551290.1 | -----                                                        |
| EF551293.1 | -----                                                        |
| EF551294.1 | -----                                                        |
| EF551300.1 | -----                                                        |
| EF551305.1 | -----                                                        |
| EF551308.1 | -----                                                        |
| EF551289.1 | -----                                                        |
| EF551291.1 | -----                                                        |
| AY191585.1 | -----                                                        |
| EF551288.1 | -----                                                        |
| AY059015.1 | -----                                                        |
| AY191587.1 | -----                                                        |

LKDKSLNVGAQFVISVASKTADVAGDGTATVIADAARELNKAEVAGIDIQEVKGAEL

|            |                                                               |
|------------|---------------------------------------------------------------|
| AY191588.1 | -----                                                         |
| AY191589.1 | -----                                                         |
| EF551310.1 | -----                                                         |
| EF551303.1 | -----                                                         |
| AY191586.1 | -----                                                         |
| CAM79983.1 | KAVEAVIADVRKNSSPVKNEEEIAQVATVSSNGDREIGEKEIANAMKQVGQEGVITVEDSK |
| BAG39717.1 | KAVEAVIADVRKNSSPVKNEEEIAQVATVSSNGDREIGEKEIANAMKQVGQEGVITVEDSK |
| M31887.1   | KAVEAVIADVRKNSSPVKNEEEIAQVATVSSNGDREIGEKEIANAMKQVGQEGVITVEDSK |
| EF551292.1 | -----                                                         |
| EF551295.1 | -----                                                         |
| EF551296.1 | -----                                                         |
| EF551297.1 | -----                                                         |
| EF551298.1 | -----                                                         |
| EF551299.1 | -----                                                         |
| EF551301.1 | -----                                                         |
| EF551302.1 | -----                                                         |
| EF551304.1 | -----                                                         |
| EF551306.1 | -----                                                         |
| EF551307.1 | -----                                                         |
| EF551309.1 | -----                                                         |
| EF551290.1 | -----                                                         |
| EF551293.1 | -----                                                         |
| EF551294.1 | -----                                                         |
| EF551300.1 | -----                                                         |
| EF551305.1 | -----                                                         |
| EF551308.1 | -----                                                         |
| EF551289.1 | -----                                                         |
| EF551291.1 | -----                                                         |
| AY191585.1 | -----                                                         |
| EF551288.1 | -----                                                         |
| AY059015.1 | -----                                                         |
| AY191587.1 | -----                                                         |

KAVEAVIADVRKNSSPVKNEEEIAQVATVSSNGDREIGEKEIANAMKQVGQEGVITVEDSK

|            |                                                               |
|------------|---------------------------------------------------------------|
| AY191588.1 | ----VEVVKGMRFDGRGYSQYFATNREKMITEFENPYILLDDQKVSQVPLVPVLEAVS    |
| AY191589.1 | ----VEVVKGMRFDGRGYSQYFATNREKMITEFENPYILLDDQKVSTVQVPLVPVLEAVA  |
| EF551310.1 | -----SQYFATNREKMITEFENPYILLDDQKISTVQVPLVPVLEAVA               |
| EF551303.1 | -----SQYFATNREKMITEFENPYILLDDQKVSTXQVPLVPVLEAVA               |
| AY191586.1 | ----VEVVKGMRFDGRGYSQYFATNREKMITEFENPYILLDDQKVSTVQVPLVPVLEAVA  |
| CAM79983.1 | NFNFEVEVVKGMRFDGRGYSQYFATNREKMITEFENPYILLDDQKVSTVQVPLVPVLEAVA |
| BAG39717.1 | NFNFEVEVVKGMRFDGRGYSQYFATNREKMITEFENPYILLDDQKVSTVQVPLVPVLEAVA |
| M31887.1   | NFNFEVEVVKGMRFDGRGYSQYFATNREKMITEFENPYILLDDQKVSTVQVPLVPVLEAVA |
| EF551292.1 | -----SQYFATNREKMITEFENPYILLDDQKVSTVQVPLVPVLEAVA               |
| EF551295.1 | -----SQYFATNREKMITEFENPYILLDDQKVSTVQVPLVPVLEAVA               |
| EF551296.1 | -----SQYFATNREKMITEFENPYILLDDQKVSTVQVPLVPVLEAVA               |
| EF551297.1 | -----SQYFATNREKMITEFENPYILLDDQKVSTVQVPLVPVLEAVA               |
| EF551298.1 | -----SQYFATNREKMITEFENPYILLDDQKVSTVQVPLVPVLEAVA               |
| EF551299.1 | -----SQYFATNREKMITEFENPYILLDDQKVSTVQVPLVPVLEAVA               |
| EF551301.1 | -----SQYFATNREKMITEFENPYILLDDQKVSTVQVPLVPVLEAVA               |
| EF551302.1 | -----SQYFATNREKMITEFENPYILLDDQKVSTVQVPLVPVLEAVA               |
| EF551304.1 | -----SQYFATNREKMITEFENPYILLDDQKVSTVQVPLVPVLEAVA               |
| EF551306.1 | -----SQYFATNREKMITEFENPYILLDDQKVSTVQVPLVPVLEAVA               |
| EF551307.1 | -----SQYFATNREKMITEFENPYILLDDQKVSTVQVPLVPVLEAVA               |
| EF551309.1 | -----SQYFATNREKMITEFENPYILLDDQKVSTVQVPLVPVLEAVA               |
| EF551290.1 | -----SQYFATNREKMITEFENPYILLDDQKVSTVQVPLVPVLEAVA               |
| EF551293.1 | -----SQYFATNREKMITEFENPYILLDDQKVSTVQVPLVPVLEAVA               |
| EF551294.1 | -----SQYFATNREKMITEFENPYILLDDQKVSTVQVPLVPVLEAVA               |
| EF551300.1 | -----SQYFATNREKMITEFENPYILLDDQKVSTVQVPLVPVLEAVA               |
| EF551305.1 | -----SQYFATNREKMITEFENPYILLDDQKVSTVQVPLVPVLEAVA               |
| EF551308.1 | -----SQYFATNREKMITEFENPYILLDDQKVSTVQVPLVPVLEAVA               |
| EF551289.1 | -----SQYFATNREKMITEFENPYILLDDQKVSTVQVPLVPVLEAVA               |
| EF551291.1 | -----SQYFATNREKMITEFENPYILLDDQKVSTVQVPLVPVLEAVA               |
| AY191585.1 | ----VEVVKGMRFDGRGYSQYFATNREKMITEFENPYILLDDQKVSTVQVPLVPVLEAVA  |
| EF551288.1 | -----SQYFATNREKMITEFENPYILLDDQKVSTVQVPLVPVLEAVA               |

|            |                                                               |
|------------|---------------------------------------------------------------|
| AY059015.1 | -----VEVVKGMRFRDGYISQYFATNREKMITEFENPYILLDDQKVSTVQPLVPVLEAVA  |
| AY191587.1 | -----VEVVKGMRFRDGYISQYFATNREKMITEFENPYILLDDQKVSTVQPLVPVLEAVA  |
|            | *****:*:*****:*****:                                          |
|            | NFNFEVEVVKGMRFRDGYISQYFATNREKMITEFENPYILLDDQKVSTVQPLVPVLEAVA  |
|            |                                                               |
| AY191588.1 | DTGKPLVLIADDVDGEALTALILNNLKGSIKVVAVKAPGFGDRKKEMLEDIAILTNGEVI  |
| AY191589.1 | HTGKPLELIADDVDGEALTALILNNLKGSIKVVAVKAPGFGDRKKEMLEDIAILTNGEVI  |
| EF551310.1 | HTGKPLVLIADDVDGEALTALILNNLKGSIKVVAVKAPGFGDRKKEMLEDIAILTNGEVI  |
| EF551303.1 | HTGKPLVLIADDVDGEALTALILNNLKGSIKVVAVKAPGFGDRKKEMLEDIAILTNGEVI  |
| AY191586.1 | HTGKPLVLIADDVDGEALTALILNNLKGSIKVVAVKAPGFGDRKKEMLEDIAILTNGEVI  |
| CAM79983.1 | HTGKPLVLIADDVDGEALTALILNNLKGSIKVVAVKAPGFGDRKKEMLEDIAILTNGEVI  |
| BAG39717.1 | HTGKPLVLIADDVDGEALTALILNNLKGSIKVVAVKAPGFGDRKKEMLEDIAILTNGEVI  |
| M31887.1   | HTGKPLVLIADDVDGEALTALILNNLKGSIKVVAVKAPGFGDRKKEMLEDIAILTNGEVI  |
| EF551292.1 | HTGKPLVLIADDVDGEALTALILNNLKGSIKVVAVKAPGFGDRKKEMLEDIAILTNGEVI  |
| EF551295.1 | HTGKPLVLIADDVDGEALTALILNNLKGSIKVVAVKAPGFGDRKKEMLEDIAILTNGEVI  |
| EF551296.1 | HTGKPLVLIADDVDGEALTALILNNLKGSIKVVAVKAPGFGDRKKEMLEDIAILTNGEVI  |
| EF551297.1 | HTGKPLVLIADDVDGEALTALILNNLKGSIKVVAVKAPGFGDRKKEMLEDIAILTNGEVI  |
| EF551298.1 | HTGKPLVLIADDVDGEALTALILNNLKGSIKVVAVKAPGFGDRKKEMLEDIAILTNGEVI  |
| EF551299.1 | HTGKPLVLIADDVDGEALTALILNNLKGSIKVVAVKAPGFGDRKKEMLEDIAILTNGEVI  |
| EF551301.1 | HTGKPLVLIADDVDGEALTALILNNLKGSIKVVAVKAPGFGDRKKEMLEDIAILTNGEVI  |
| EF551302.1 | HTGKPLVLIADDVDGEALTALILNNLKGSIKVVAVKAPGFGDRKKEMLEDIAILTNGEVI  |
| EF551304.1 | HTGKPLVLIADDVDGEALTALILNNLKGSIKVVAVKAPGFGDRKKEMLEDIAILTNGEVI  |
| EF551306.1 | HTGKPLVLIADDVDGEALTALILNNLKGSIKVVAVKAPGFGDRKKEMLEDIAILTNGEVI  |
| EF551307.1 | HTGKPLVLIADDVDGEALTALILNNLKGSIKVVAVKAPGFGDRKKEMLEDIAILTNGEVI  |
| EF551309.1 | HTGKPLVLIADDVDGEALTALILNNLKGSIKVVAVKAPGFGDRKKEMLEDIAILTNGEVI  |
| EF551290.1 | HTGKPLVLIADDVDGEALTALILNNLKGSIKVVAVKAPGFGDRKKEMLEDIAILTNGEVI  |
| EF551293.1 | HTGKPLVLIADDVDGEALTALILNNLKGSIKVVAVKAPGFGDRKKEMLEDIAILTNGEVI  |
| EF551294.1 | HTGKPLVLIADDVDGEALTALILNNLKGSIKVVAVKAPGFGDRKKEMLEDIAILTNGEVI  |
| EF551300.1 | HTGKPLVLIADDVDGEALTALILNNLKGSIKVVAVKAPGFGDRKKEMLEDIAILTNGEVI  |
| EF551305.1 | HTGKPLVLIADDVDGEALTALILNNLKGSIKVVAVKAPGFGDRKKEMLEDIAILTNGEVI  |
| EF551308.1 | HTGKPLVLIADDVDGEALTALILNNLKGSIKVVAVKAPGFGDRKKEMLEDIAILTNGEVI  |
| EF551289.1 | HTGKPLVLIADDVDGEALTALILNNLKGSIKVVAVKAPGFGDRKKEMLEDIAILTNGEVI  |
| EF551291.1 | HTGKPLVLIADDVDGEALTALILNNLKGSIKVVAVKAPGFGDRKKEMLEDIAILTNGEVI  |
| AY191585.1 | HTGKPLVLIADDVDGEALTALILNNLKGSIKVVAVKAPGFGDRKKEMLEDIAILTNGEVI  |
| EF551288.1 | HTGKPLVLIADDVDGEALTALILNNLKGSIKVVAVKAPGFGDRKKEMLEDIAILTNGEVI  |
| AY059015.1 | HTGKPLVLIADDVDGEALTALILNNLKGSIKVVAVKAPGFGDRKKEMLEDIAILTNGEVI  |
| AY191587.1 | .*****                                                        |
|            | HTGKPLVLIADDVDGEALTALILNNLKGSIKVVAVKAPGFGDRKKEMLEDIAILTNGEVI  |
|            |                                                               |
| AY191588.1 | TEQLGIKLEKVNDTSKLGATANRVIVTKDHTTIVHDKNNSDIEKKVNSRCEQIREAIKDTT |
| AY191589.1 | TEQLGIKLEKVNDTSKLGATANRVIVTKDHTTIVHDKNNSDIEKKVNSRCEQIREAIKDTT |
| EF551310.1 | TEQLGIKLEKVNDTSKLGATANRVIVTKDHTTIVHDKNNSDIEKKVNSRCEQ-----     |
| EF551303.1 | TEQLGIKLEKVNDTSKLGATANRVIVTKDHTTIVHDKNNSDIEKKVNSRCEQ-----     |
| AY191586.1 | TEQLGIKLEKVNDTSKLGATANRVIVTKDHTTIVHDKNNSDIEKKVNSRCEQIREAIKDTT |
| CAM79983.1 | TEQLGIKLEKVNDTSKLGATANRVIVTKDHTTIVHDKNNSDIEKKVNSRCEQIREAIKDTT |
| BAG39717.1 | TEQLGIKLEKVNDTSKLGATANRVIVTKDHTTIVHDKNNSDIEKKVNSRCEQIREAIKDTT |
| M31887.1   | TEQLGIKLEKVNDTSKLGATANRVIVTKDHTTIVHDKNNSDIEKKVNSRCEQIREAIKDTT |
| EF551292.1 | TEQLGIKLEKVNDTSKLGATANRVIVTKDHTTIVHDKNNSDIEKKVNSRCEQ-----     |
| EF551295.1 | TEQLGIKLEKVNDTSKLGATANRVIVTKDHTTIVHDKNNSDIEKKVNSRCEQ-----     |
| EF551296.1 | TEQLGIKLEKVNDTSKLGATANRVIVTKDHTTIVHDKNNSDIEKKVNSRCEQ-----     |
| EF551297.1 | TEQLGIKLEKVNDTSKLGATANRVIVTKDHTTIVHDKNNSDIEKKVNSRCEQ-----     |
| EF551298.1 | TEQLGIKLEKVNDTSKLGATANRVIVTKDHTTIVHDKNNSDIEKKVNSRCEQ-----     |
| EF551299.1 | TEQLGIKLEKVNDTSKLGATANRVIVTKDHTTIVHDKNNSDIEKKVNSRCEQ-----     |
| EF551301.1 | TEQLGIKLEKVNDTSKLGATANRVIVTKDHTTIVHDKNNSDIEKKVNSRCEQ-----     |
| EF551302.1 | TEQLGIKLEKVNDTSKLGATANRVIVTKDHTTIVHDKNNSDIEKKVNSRCEQ-----     |
| EF551304.1 | TEQLGIKLEKVNDTSKLGATANRVIVTKDHTTIVHDKNNSDIEKKVNSRCEQ-----     |
| EF551306.1 | TEQLGIKLEKVNDTSKLGATANRVIVTKDHTTIVHDKNNSDIEKKVNSRCEQ-----     |
| EF551307.1 | TEQLGIKLEKVNDTSKLGATANRVIVTKDHTTIVHDKNNSDIEKKVNSRCEQ-----     |
| EF551309.1 | TEQLGIKLEKVNDTSKLGATANRVIVTKDHTTIVHDKNNSDIEKKVNSRCEQ-----     |
| EF551290.1 | TEQLGIKLEKVNDTSKLGATANRVIVTKDHTTIVHDKNNSDIEKKVNSRCEQ-----     |
| EF551293.1 | TEQLGIKLEKVNDTSKLGATANRVIVTKDHTTIVHDKNNSDIEKKVNSRCEQ-----     |
| EF551294.1 | TEQLGIKLEKVNDTSKLGATANRVIVTKDHTTIVHDKNNSDIEKKVNSRCEQ-----     |
| EF551300.1 | TEQLGIKLEKVNDTSKLGATANRVIVTKDHTTIVHDKNNSDIEKKVNSRCEQ-----     |
| EF551305.1 | TEQLGIKLEKVNDTSKLGATANRVIVTKDHTTIVHDKNNSDIEKKVNSRCEQ-----     |
| EF551308.1 | TEQLGIKLEKVNDTSKLGATANRVIVTKDHTTIVHDKNNSDIEKKVNSRCEQ-----     |
| EF551289.1 | TEQLGIKLEKVNDTSKLGATANRVIVTKDHTTIVHDKNNSDIEKKVNSRCEQ-----     |
| EF551291.1 | TEQLGIKLEKVNDTSKLGATANRVIVTKDHTTIVHDKNNSDIEKKVNSRCEQ-----     |

|            |                                                                |
|------------|----------------------------------------------------------------|
| AY191585.1 | TEQLGIKLEKVNDTSKLG TANRVIVTKDHTTIVHDKNNSDIEKKVNSRCEQIREAIKDTT  |
| EF551288.1 | TEQLGIKLEKVNDTSKLG TANRVIVTKDHTTIVHDKNNSDIEKKVNSRCEQ-----      |
| AY059015.1 | TEQLGIKLEKVNDTSKLG TANRVIVTKDHTTIVHDKNNSDIEKKVNSRCEQIREAIKDTT  |
| AY191587.1 | TEQLGIKLEKVNDTSKLG TANRVIVTKDHTTIVHDKNNSDIEKKVNSRCEQIREAIKDTT  |
|            | *****                                                          |
|            | TEQLGIKLEKVNDTSKLG TANRVIVTKDHTTIVHDKNNSDIEKKVNSRCEQIREAIKDTT  |
|            |                                                                |
| AY191588.1 | SDYEKEK-----                                                   |
| AY191589.1 | SDYDKEK-----                                                   |
| EF551310.1 | -----                                                          |
| EF551303.1 | -----                                                          |
| AY191586.1 | SDYEKEK-----                                                   |
| CAM79983.1 | SDYEKEKLQERLAKLRNGVAVLKVGGATEVEQKERKDRVEDALHATRAAVEEGIVPGGGV   |
| BAG39717.1 | SDYEKEKLQERLAKLRNGVAVLKVGGATEVEQKERKDRVEDALHATRAAVEEGIVPGGGV   |
| M31887.1   | SDYEKEKLQERLAKLRNGVAVLKVGGATEVEQKERKDRVEDALHATRAAVEEGIVPGGGV   |
| EF551292.1 | -----                                                          |
| EF551295.1 | -----                                                          |
| EF551296.1 | -----                                                          |
| EF551297.1 | -----                                                          |
| EF551298.1 | -----                                                          |
| EF551299.1 | -----                                                          |
| EF551301.1 | -----                                                          |
| EF551302.1 | -----                                                          |
| EF551304.1 | -----                                                          |
| EF551306.1 | -----                                                          |
| EF551307.1 | -----                                                          |
| EF551309.1 | -----                                                          |
| EF551290.1 | -----                                                          |
| EF551293.1 | -----                                                          |
| EF551294.1 | -----                                                          |
| EF551300.1 | -----                                                          |
| EF551305.1 | -----                                                          |
| EF551308.1 | -----                                                          |
| EF551289.1 | -----                                                          |
| EF551291.1 | -----                                                          |
| AY191585.1 | SDYEKEK-----                                                   |
| EF551288.1 | -----                                                          |
| AY059015.1 | SDYEKEK-----                                                   |
| AY191587.1 | SDYEKEK-----                                                   |
|            |                                                                |
|            | SDYEKEKLQERLAKLRNGVAVLKVGGATEVEQKERKDRVEDALHATRAAVEEGIVPGGGV   |
|            |                                                                |
| AY191588.1 | -----                                                          |
| AY191589.1 | -----                                                          |
| EF551310.1 | -----                                                          |
| EF551303.1 | -----                                                          |
| AY191586.1 | -----                                                          |
| CAM79983.1 | ALFYASRVLD SLKFDNEDQRVGINI IKKVLEAPVRQIVKNAGGKEDVVVNELSKSNDKNR |
| BAG39717.1 | ALFYASRVLD SLKFDNEDQRVGINI IKKVLEAPVRQIVKNAGGKEDVVVNELSKSNDKNR |
| M31887.1   | ALFYASRVLD SLKFDNEDQRVGINI IKKVLEAPVRQIVKNAGGKEDVVVNELSKSTDKNR |
| EF551292.1 | -----                                                          |
| EF551295.1 | -----                                                          |
| EF551296.1 | -----                                                          |
| EF551297.1 | -----                                                          |
| EF551298.1 | -----                                                          |
| EF551299.1 | -----                                                          |
| EF551301.1 | -----                                                          |
| EF551302.1 | -----                                                          |
| EF551304.1 | -----                                                          |
| EF551306.1 | -----                                                          |
| EF551307.1 | -----                                                          |
| EF551309.1 | -----                                                          |
| EF551290.1 | -----                                                          |
| EF551293.1 | -----                                                          |
| EF551294.1 | -----                                                          |
| EF551300.1 | -----                                                          |
| EF551305.1 | -----                                                          |
| EF551308.1 | -----                                                          |

|            |       |
|------------|-------|
| EF551289.1 | ----- |
| EF551291.1 | ----- |
| AY191585.1 | ----- |
| EF551288.1 | ----- |
| AY059015.1 | ----- |
| AY191587.1 | ----- |

ALFYASRVLD SLKFDNEDQ R VGINI I KKVLEAPVRQ I VKNAGGKEDVVVNELSKSTDKNR

|            |                                                              |
|------------|--------------------------------------------------------------|
| AY191588.1 | -----                                                        |
| AY191589.1 | -----                                                        |
| EF551310.1 | -----                                                        |
| EF551303.1 | -----                                                        |
| AY191586.1 | -----                                                        |
| CAM79983.1 | GFDARTMQYVDMIKAGIVDPTKVVRTALQDAFSVASLVIATSAMITDHEEDNNT-NRSGG |
| BAG39717.1 | GFDARTMQYVDMIKAGIVDPTKVVRTALQDAFSVASLVIATSAMITDHEEDNNTGNRSGG |
| M31887.1   | GFDARTMQYVDMIKAGIVDPTKVVRTALQDAFSVASLVIATSAMITDHEEDNNTGNRSGG |
| EF551292.1 | -----                                                        |
| EF551295.1 | -----                                                        |
| EF551296.1 | -----                                                        |
| EF551297.1 | -----                                                        |
| EF551298.1 | -----                                                        |
| EF551299.1 | -----                                                        |
| EF551301.1 | -----                                                        |
| EF551302.1 | -----                                                        |
| EF551304.1 | -----                                                        |
| EF551306.1 | -----                                                        |
| EF551307.1 | -----                                                        |
| EF551309.1 | -----                                                        |
| EF551290.1 | -----                                                        |
| EF551293.1 | -----                                                        |
| EF551294.1 | -----                                                        |
| EF551300.1 | -----                                                        |
| EF551305.1 | -----                                                        |
| EF551308.1 | -----                                                        |
| EF551289.1 | -----                                                        |
| EF551291.1 | -----                                                        |
| AY191585.1 | -----                                                        |
| EF551288.1 | -----                                                        |
| AY059015.1 | -----                                                        |
| AY191587.1 | -----                                                        |

GFDARTMQYVDMIKAGIVDPTKVVRTALQDAFSVASLVIATSAMITDHEEDNNTGNRSGG

|            |                 |
|------------|-----------------|
| AY191588.1 | -----           |
| AY191589.1 | -----           |
| EF551310.1 | -----           |
| EF551303.1 | -----           |
| AY191586.1 | -----           |
| CAM79983.1 | GVGGGHHGGMGGMDF |
| BAG39717.1 | GVGGGHHGGMGGMDF |
| M31887.1   | GVGGGHHGGMGGMDF |
| EF551292.1 | -----           |
| EF551295.1 | -----           |
| EF551296.1 | -----           |
| EF551297.1 | -----           |
| EF551298.1 | -----           |
| EF551299.1 | -----           |
| EF551301.1 | -----           |
| EF551302.1 | -----           |
| EF551304.1 | -----           |
| EF551306.1 | -----           |
| EF551307.1 | -----           |
| EF551309.1 | -----           |
| EF551290.1 | -----           |
| EF551293.1 | -----           |
| EF551294.1 | -----           |
| EF551300.1 | -----           |

```

EF551305.1  -----
EF551308.1  -----
EF551289.1  -----
EF551291.1  -----
AY191585.1  -----
EF551288.1  -----
AY059015.1  -----
AY191587.1  -----

```

GVGGGHHGGMGGMDF

**Consensus sequence of the GroEL chaperonin of *O. tsutsugamushi***

```

MSKQIVHSDQCRKKIIEGINVVANAVGITLGPKGRCVAIEQSYGPPKITKDGVSVAKAIQLKDKSLNVGAQFVISVASKT
ADVAGDGTATVIADAAVRELNKAIEVAGIDIQEVKGAEKAVEAVIADVRKNSSPVKNEEEIAQVATVSSNGDREIGEK
IANAMKQVQEGVITVEDSKNFNFEVEVVKGMRFDGRGYSQYFATNREKMITFENPYIILLDQKVSTVQPLVPVLEAVA
HTGKPLVLIADDVDGEALTALILNNLKGSIKVVAVKAPGFGDRKKEMLEDIAILTNGEVITEQLGIKLEKVNDTSKLGTA
NRVIVTKDHTTIVHDKNNSDIEKKVNSRCEQIREAIKDTTSDYEKEKLQERLAKLRNGVAVLKVGGATEVEQKERKDRVE
DALHATRAAVEEGIVPGGGVALFYASRVLDLKFEDNQVRGINIIKKVLEAPVRQIVKNAGGKEDVVVNELSKSTDKNR
GFDARTMQYVDMIKAGIVDPTKVVRTALQDAFSVASLVIATSAMITDHEEDNNTGNRSGGGVGGGHHGGMGGMDF

```

**Figure S1.** CLUSTAL Omega (1.2.0) multiple sequence alignment of GroEL chaperonin of *O. tsutsugamushi* and the consensus sequence.

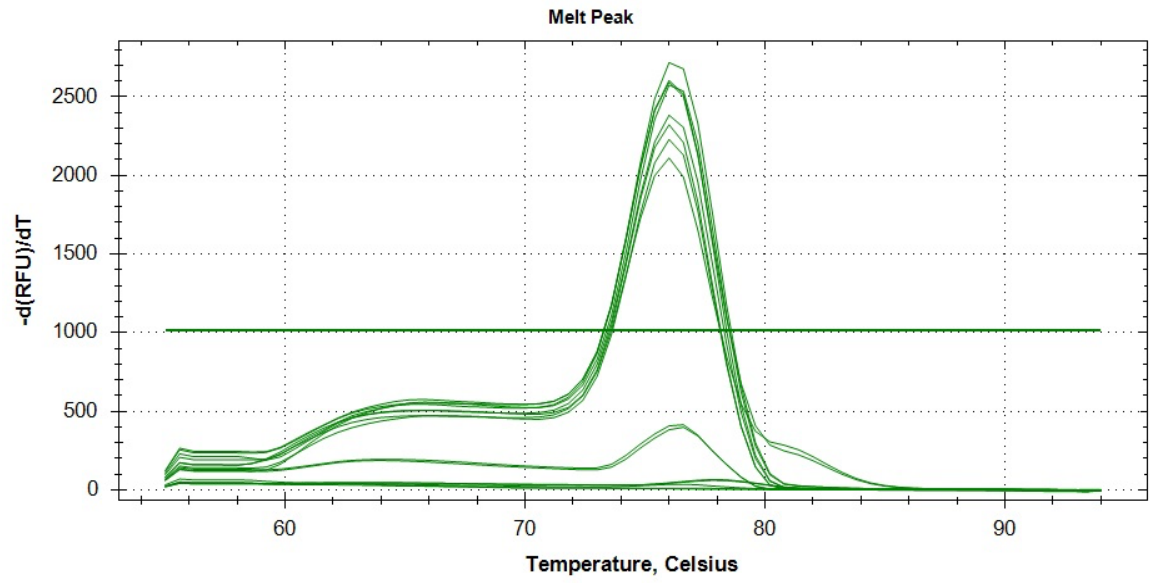

**Figure S2.** Melting curve of real-time PCR for detecting gene coding for *O. tsutsugamushi* GroEL. Melting curve analysis was performed with increments of 1 °C/step (72-95 °C) to determine the change in peak fluorescence over time ( $dF/dT$ ).



**Table S1.** Performance of the ICT AgTK on the 40 frozen serum samples compared with the original diagnoses based on clinical features and laboratory tests including *Leptospira* IFA for leptospirosis and *O. tsutsugamushi* IFA for scrub typhus (Department of Medical Sciences, Ministry of Public Health, Thailand) and Dengue NS1 antigen and Dengue IgG/IgM ELISA for Dengue fever (SD Biosensor, Korea). ST = scrub typhus diagnosis; DF = Dengue fever diagnosis; LT = leptospirosis diagnosis.

| No. | Code     | Original diagnosis | <i>Leptospira</i> IFA |        | Dengue NS1 antigen | Dengue IgG/IgM ELISA |       | <i>O. tsutsugamushi</i> IFA |         | ICT AgTK |
|-----|----------|--------------------|-----------------------|--------|--------------------|----------------------|-------|-----------------------------|---------|----------|
|     |          |                    | IgM                   | IgG    | NS1                | IgM                  | IgG   | IgM                         | IgG     | GroEL    |
| 1   | 11-1-003 | ST                 | <1.50                 | <1.50  | Negative           | <1.50                | <1.50 | 1:3,200                     | 1:100   | Negative |
| 2   | 11-1-004 | ST                 | <1.50                 | <1.50  | Negative           | <1.50                | <1.50 | ≤1:6400                     | ≤1:6400 | Positive |
| 3   | 11-1-014 | ST                 | <1.50                 | <1.50  | Negative           | <1.50                | <1.50 | ≤1:6400                     | 1:1600  | Positive |
| 4   | 11-1-035 | ST                 | <1.50                 | <1.50  | Negative           | <1.50                | <1.50 | ≤1:6400                     | 1:800   | Positive |
| 5   | 11-1-118 | ST                 | <1.50                 | <1.50  | Negative           | <1.50                | <1.50 | ≤1:6400                     | ≤1:6400 | Positive |
| 6   | 11-1-124 | ST                 | <1.50                 | <1.50  | Negative           | <1.50                | <1.50 | ≤1:6400                     | ≤1:6400 | Positive |
| 7   | 11-1-154 | ST                 | <1.50                 | <1.50  | Negative           | <1.50                | <1.50 | 1:1600                      | ≤1:6400 | Positive |
| 8   | 11-1-171 | ST                 | <1.50                 | <1.50  | Negative           | <1.50                | <1.50 | 1:800                       | 1:3200  | Positive |
| 9   | 11-1-174 | ST                 | <1.50                 | <1.50  | Negative           | <1.50                | <1.50 | 1:800                       | 1:1600  | Positive |
| 10  | 11-1-179 | ST                 | <1.50                 | <1.50  | Negative           | <1.50                | <1.50 | 1:3200                      | 1:3200  | Positive |
| 11  | 11-1-192 | ST                 | <1.50                 | <1.50  | Negative           | <1.50                | <1.50 | ≤1:6400                     | 1:800   | Negative |
| 12  | 11-1-227 | ST                 | <1.50                 | <1.50  | Negative           | <1.50                | <1.50 | ≤1:6400                     | 1:3200  | Positive |
| 13  | 11-1-247 | ST                 | <1.50                 | <1.50  | Negative           | <1.50                | <1.50 | 1:200                       | 1:3200  | positive |
| 14  | 11-1-248 | ST                 | <1.50                 | <1.50  | Negative           | <1.50                | <1.50 | 1:400                       | ≤1:6400 | Positive |
| 15  | 11-1-259 | ST                 | <1.50                 | <1.50  | Negative           | <1.50                | <1.50 | 1:800                       | 1:800   | Positive |
| 16  | 11-1-286 | ST                 | <1.50                 | <1.50  | Negative           | <1.50                | <1.50 | 1:400                       | 1:3200  | Positive |
| 17  | 11-1-295 | ST                 | <1.50                 | <1.50  | Negative           | <1.50                | <1.50 | 1:100                       | 1:800   | Positive |
| 18  | 11-1-334 | ST                 | <1.50                 | <1.50  | Negative           | <1.50                | <1.50 | <1.50                       | 1:1600  | Negative |
| 19  | 11-1-353 | ST                 | <1.50                 | <1.50  | Negative           | <1.50                | <1.50 | 1:1600                      | 1:1600  | Positive |
| 20  | 11-1-379 | ST                 | <1.50                 | <1.50  | Negative           | <1.50                | <1.50 | 1:400                       | 1:1600  | Positive |
| 21  | 4-0079.2 | DF                 | <1.50                 | <1.50  | Positive           | <1.50                | <1.50 | <1.50                       | <1.50   | Negative |
| 22  | 4-0623   | DF                 | <1.50                 | <1.50  | positive           | <1.50                | <1.50 | <1.50                       | <1.50   | Negative |
| 23  | 4-0640   | DF                 | <1.50                 | <1.50  | Positive           | <1.50                | <1.50 | <1.50                       | <1.50   | Negative |
| 24  | 4-0651   | DF                 | <1.50                 | <1.50  | Positive           | <1.50                | <1.50 | <1.50                       | <1.50   | Negative |
| 25  | 4-0660   | DF                 | <1.50                 | <1.50  | Positive           | <1.50                | <1.50 | <1.50                       | <1.50   | Negative |
| 26  | 4-0661   | DF                 | <1.50                 | <1.50  | Positive           | <1.50                | <1.50 | <1.50                       | <1.50   | Negative |
| 27  | 4-0682   | DF                 | <1.50                 | <1.50  | Positive           | <1.50                | <1.50 | <1.50                       | <1.50   | Negative |
| 28  | 4-0700   | DF                 | <1.50                 | <1.50  | positive           | <1.50                | <1.50 | <1.50                       | <1.50   | Negative |
| 29  | 4-0706   | DF                 | <1.50                 | <1.50  | Positive           | <1.50                | <1.50 | <1.50                       | <1.50   | Negative |
| 30  | 4-0718   | DF                 | <1.50                 | <1.50  | Positive           | <1.50                | <1.50 | <1.50                       | <1.50   | Negative |
| 31  | 11-1-116 | LT                 | 1:800                 | 1:1600 | Negative           | <1.50                | <1.50 | <1.50                       | <1.50   | Negative |
| 32  | 11-1-144 | LT                 | ≤1:6400               | 1:100  | Negative           | <1.50                | <1.50 | <1.50                       | <1.50   | Negative |
| 33  | 11-1-183 | LT                 | 1:200                 | 1:200  | Negative           | <1.50                | <1.50 | <1.50                       | <1.50   | Negative |
| 34  | 11-1-187 | LT                 | 1:400                 | <1.50  | Negative           | <1.50                | <1.50 | <1.50                       | <1.50   | Negative |

| No. | Code     | Original<br>diagnosis | <i>Leptospira</i><br>IFA |        | Dengue NS1<br>antigen | Dengue<br>IgM/IgG ELISA |       | <i>O. tsutsugamushi</i><br>IFA |       | ICT AgTK |
|-----|----------|-----------------------|--------------------------|--------|-----------------------|-------------------------|-------|--------------------------------|-------|----------|
|     |          |                       | IgM                      | IgG    | NS1                   | IgM                     | IgG   | IgM                            | IgG   | GroEL    |
| 35  | 11-1-253 | LT                    | 1:400                    | 1:50   | Negative              | <1:50                   | <1:50 | <1:50                          | <1:50 | Negative |
| 36  | 11-1-272 | LT                    | 1:400                    | 1:100  | Negative              | <1:50                   | <1:50 | <1:50                          | <1:50 | Negative |
| 37  | 3607     | LT                    | 1:100                    | 1:400  | Negative              | <1:50                   | <1:50 | <1:50                          | <1:50 | Negative |
| 38  | 3261     | LT                    | 1:800                    | 1:3200 | Negative              | <1:50                   | <1:50 | <1:50                          | <1:50 | Negative |
| 39  | 2692     | LT                    | 1:100                    | 1:400  | Negative              | <1:50                   | <1:50 | <1:50                          | <1:50 | Negative |
| 40  | 2454     | LT                    | 1:400                    | 1:100  | Negative              | <1:50                   | <1:50 | <1:50                          | <1:50 | Negative |

**Table S2.** Results of the GRoEL detection by using the ICT AgTK and real-time PCR performed blindly in our laboratory in comparison to the laboratory diagnoses performed at laboratory of Nan Hospital using test kits from SD Biosensor, Korea.

| Code no. | Age (years) | Sex | Clinical and lab diagnosis at Nan hospital | Scrub typhus real-time PCR using either plasma or buffy coat samples | Scrub typhus ICT AgTK using either plasma or buffy coat samples | Results of ICT AgTK using plasma                                                      |   |
|----------|-------------|-----|--------------------------------------------|----------------------------------------------------------------------|-----------------------------------------------------------------|---------------------------------------------------------------------------------------|---|
|          |             |     |                                            |                                                                      |                                                                 | T                                                                                     | C |
| 1        | 47          | F   | Scrub typhus                               | +                                                                    | +                                                               |    |   |
| 2        | 35          | F   | Dengue fever                               | -                                                                    | -                                                               |    |   |
| 3        | 35          | M   | Leptospirosis                              | -                                                                    | -                                                               |    |   |
| 4        | 52          | M   | Scrub typhus                               | +                                                                    | +                                                               |    |   |
| 5        | 72          | M   | Leptospirosis                              | -                                                                    | -                                                               |    |   |
| 6        | 18          | M   | Dengue fever                               | -                                                                    | -                                                               |    |   |
| 7        | 59          | F   | Dengue fever                               | -                                                                    | -                                                               |    |   |
| 8        | 52          | F   | Scrub typhus                               | +                                                                    | +                                                               |   |   |
| 9        | 39          | M   | Scrub typhus                               | +                                                                    | +                                                               |  |   |
| 10       | 28          | M   | Scrub typhus                               | +                                                                    | +                                                               |  |   |
| 11       | 42          | F   | Scrub typhus                               | +                                                                    | +                                                               |  |   |
| 12       | 55          | F   | Scrub typhus                               | +                                                                    | +                                                               |  |   |
| 13       | 21          | F   | Scrub typhus                               | +                                                                    | +                                                               |  |   |
| 14       | 38          | M   | Scrub typhus                               | +                                                                    | +                                                               |  |   |
| 15       | 50          | F   | Scrub typhus                               | +                                                                    | +                                                               |  |   |

**Table S3.** Performance of the ICT AgTK evaluated independently at Prasat Hospital, Surin Province, by the hospital's medical technologist in comparison with the results of commercialized test kit (SD Biosensor, Korea) for detection of antibody (IgM/IgG) to *O. tsutsugamushi*.

| No. | IgM/IgG to<br><i>tsutsugamushi</i>             | O. | ICT AgTK        | ICT AgTK strip |   |
|-----|------------------------------------------------|----|-----------------|----------------|---|
|     |                                                |    |                 | T              | C |
| 1   | IgM Positive<br>IgG Positive (weakly)          |    | Positive        |                |   |
| 2   | IgM Negative<br>IgG Negative                   |    | Negative        |                |   |
| 3   | IgM Negative<br>IgG Negative                   |    | Negative        |                |   |
| 4   | IgM Negative<br>IgG Negative                   |    | Negative        |                |   |
| 5   | IgM Positive<br>IgG Negative                   |    | Positive        |                |   |
| 6   | IgM Positive<br>IgG Negative                   |    | Weakly positive |                |   |
| 7   | IgM Negative<br>IgG Positive                   |    | Positive        |                |   |
| 8   | IgM Positive<br>IgG Negative                   |    | Positive        |                |   |
| 9   | IgM Negative<br>IgG Negative                   |    | Negative        |                |   |
| 10  | IgM Positive (weakly)<br>IgG Positive (weakly) |    | Positive        |                |   |
| 11  | IgM Negative<br>IgG Negative                   |    | Negative        |                |   |
| 12  | IgM Negative<br>IgG Negative                   |    | Negative        |                |   |
| 13  | IgM Negative<br>IgG Negative                   |    | Negative        |                |   |
| 14  | IgM Negative<br>IgG Negative                   |    | Negative        |                |   |
| 15  | IgM Negative<br>IgG Negative                   |    | Negative        |                |   |
| 16  | IgM Negative<br>IgG Negative                   |    | Negative        |                |   |
| 17  | IgM Negative<br>IgG Negative                   |    | Negative        |                |   |
| 18  | IgM Negative<br>IgG Negative                   |    | Negative        |                |   |
| 19  | IgM Negative<br>IgG Negative                   |    | Negative        |                |   |
| 20  | IgM Negative<br>IgG Negative                   |    | Negative        |                |   |
